# Supplementary material
Source: Springer Nature journal article supplement (https://www.springermedizin.de/resource/supplementary/13063_2014_2304_MOESM2_ESM.pdf/9621852)
Supplement: MOESM2 [file 9621852]

**Enrolment (n = 172)**

**Randomization 1:1**

**Intervention group**

Treatment of  
electrographic  
status epilepticus

**Control group**

No treatment of  
electrographic  
status epilepticus

**Follow up (3 months)**

Primary outcome: CPC at 3 months  
Secondary outcome: mortality

**Follow up (6 months)**

Secondary outcomes: CPC at 6 months, mortality

**Follow up (12 months)**

Secondary outcomes: CPC at 12 months, mortality. In case of survival: depression (MADRS), quality of life (SF-36), cognitive functioning (neuropsychological exam)
